# Supplementary material for: Efficient conversion of chemical energy into mechanical work by Hsp70 chaperones
Source: eLife journal article supplement (doi:10.7554/elife.48491), 2019-12-17
Supplement: fig4-data1 [file Figure_4_readme.pdf › Fig4/Figure_4_readme.pdf]

#### Figure 4 data

p\_n\_k.dat = ratio  $[ATP]/[ADP]$  (first column) and corresponding probability (second column) for the state with  $n=k$  chaperones bound ( $k=0,1,2,\dots,6$ ).

Mean\_N\_equilibrium\_bottom.dat = ratio  $[ATP]/[ADP]$  (first column) mean number of chaperones (second column) in the case of equilibrium (dashed black line in the bottom panel)

Mean\_N\_nonequilibrium\_bottom.dat = ratio  $[ATP]/[ADP]$  (first column) mean number of chaperones (second column) in the case of non equilibrium (continuous black line in the bottom panel)
