# Supplementary material for: Efficient conversion of chemical energy into mechanical work by Hsp70 chaperones
Source: eLife journal article supplement (doi:10.7554/elife.48491), 2019-12-17
Supplement: fig5-data1 [file elife-48491-fig5-data1-v2.zip]

## Data figure 5

FRET :

FRET\_EQ\_k.dat = average FRET for equilibrium [ATP]/[ADP] ratio in realization k (inset, blue)

FRET\_NE\_k.dat = average FRET for non equilibrium [ATP]/[ADP] ratio in realization k (inset, red)

Average\_FRET\_Efficiency.dat = experimental values (inset, black)

Rg :

Rg\_histogram\_equilibrium.dat = data for the histogram of Rg in equilibrium (main, blue)

Rg\_histogram\_non\_equilibrium.dat = data for the histogram of Rg in non equilibrium (main, red)
