# Supplementary material for: Efficient conversion of chemical energy into mechanical work by Hsp70 chaperones
Source: eLife journal article supplement (doi:10.7554/elife.48491), 2019-12-17
Supplement: supp [file elife-48491-supp-v1.zip]

Archive with 9 entries (9 files):
- elife_poa_e48491_Figure_5_source_data_1.zip
- elife_poa_e48491_Figure_4_source_data_1.zip
- elife_poa_e48491_Figure_1_source_data_1.zip
- elife_poa_e48491_Figure_2_source_data_1.zip
- elife_poa_e48491_Figure_2_figure_supplement_1.pdf
- elife_poa_e48491_Appendix_1_figure_1_source_data_1.zip
- elife_poa_e48491_Figure_6_source_data_1.zip
- elife_poa_e48491_Figure_2_figure_supplement_1_source_data_1.zip
- elife_poa_e48491_Transparent_Reporting_File.pdf
