# Supplementary material for: Efficient conversion of chemical energy into mechanical work by Hsp70 chaperones
Source: eLife journal article supplement (doi:10.7554/elife.48491), 2019-12-17
Supplement: supp [file Figure_2_readme.pdf › Fig2/Figure_2_readme.pdf]

## Data for figure 2

Rg\_vs\_G.dat = Mean Rg (first column) and free energy  $\Delta \Delta G$  (second column, expressed in kcal/mol) for each realization (corresponding to the points in the main plot)

Sanchez\_curve.dat = Rg (first column) and free energy (second column) used for the black curve

histogram\_Free\_Energy.dat = values for the histogram in the inset.
