# Supplementary figures and images for: Efficient conversion of chemical energy into mechanical work by Hsp70 chaperones
Source: eLife journal article supplement (doi:10.7554/elife.48491), 2019-12-17

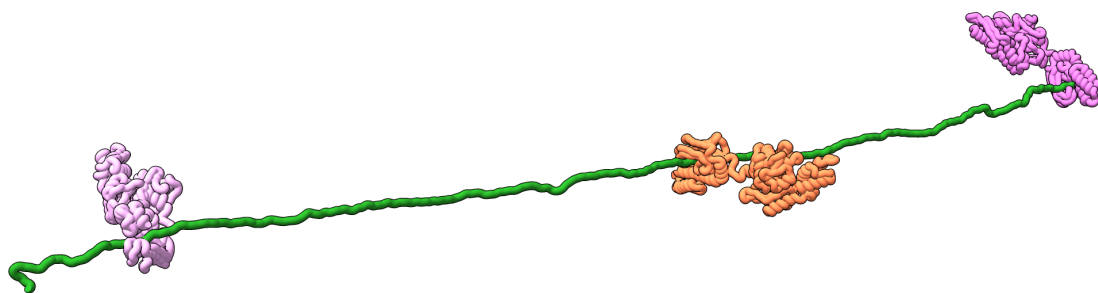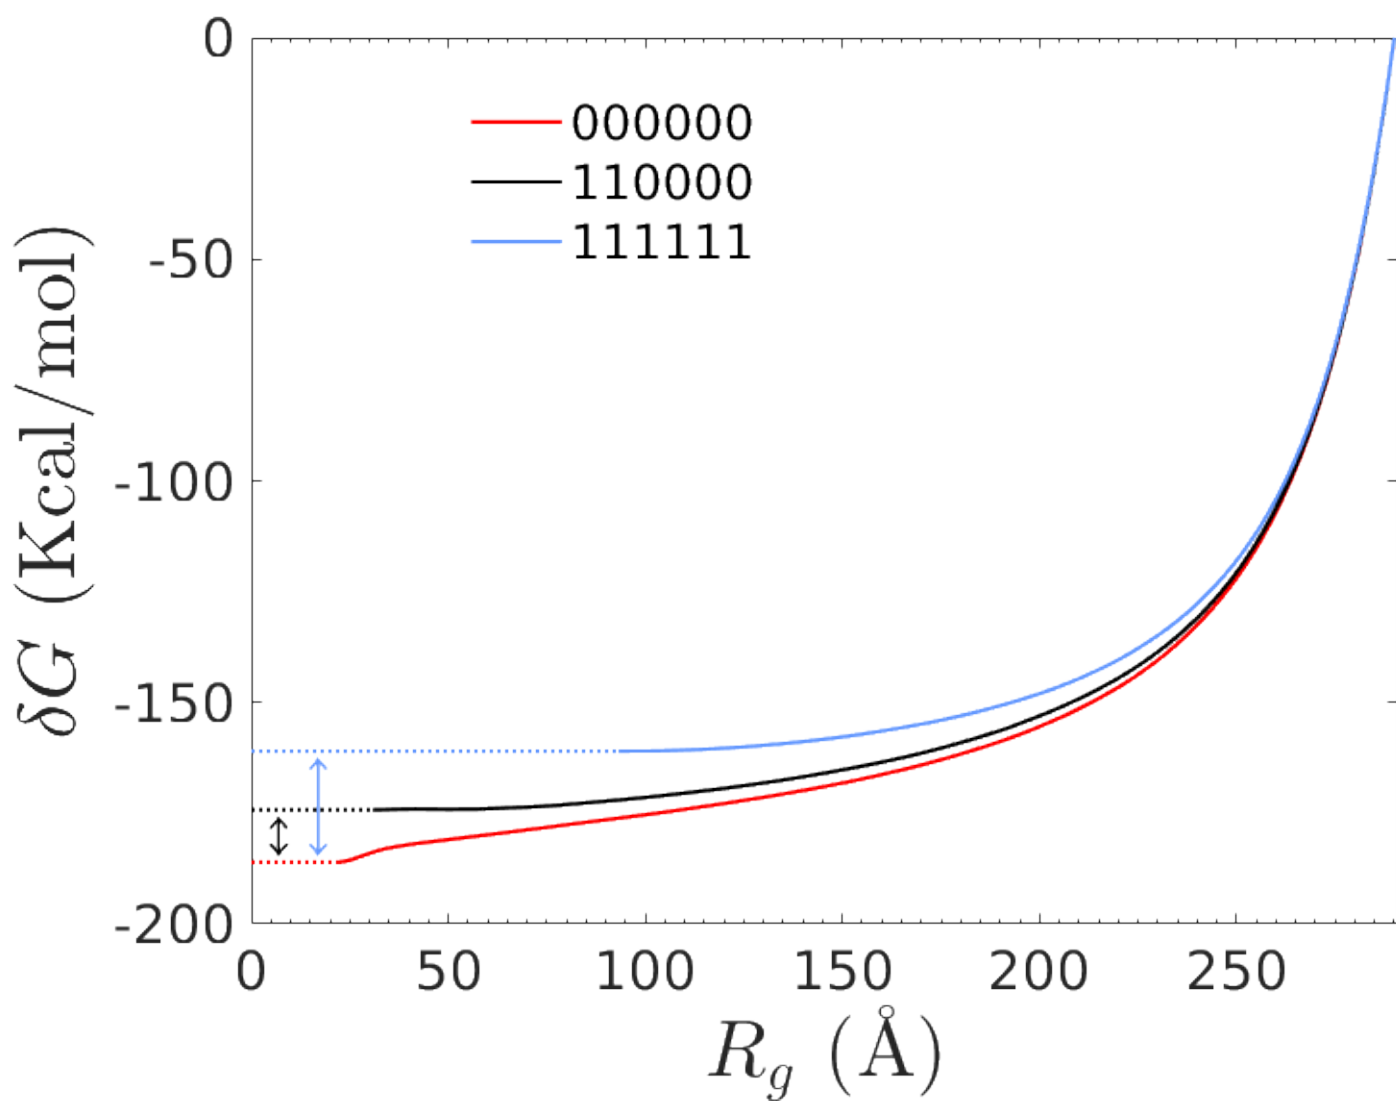

Supplement: supp [file elife-48491-supp-v1.zip › elife_poa_e48491_Figure_2_figure_supplement_1.pdf]
